# Supplementary material
Source: Springer Nature journal article supplement (https://www.springermedizin.de/resource/supplementary/13049_2013_729_MOESM7_ESM.pdf/9667238)
Supplement: MOESM7 [file 9667238]

# Patient characteristics

|    |                                                                                                                                                                                                                                                                                                                                                                                                                                                                                                           |
|----|-----------------------------------------------------------------------------------------------------------------------------------------------------------------------------------------------------------------------------------------------------------------------------------------------------------------------------------------------------------------------------------------------------------------------------------------------------------------------------------------------------------|
| 33 | <p><b>What was the estimated number of population at risk from the major incident? (e.g. number of passengers on a train / ship)</b><br/>Please explain how the above number of population at risk was reached?</p>                                                                                                                                                                                                                                                                                       |
| 34 | <p><b>Gender</b><br/> <input type="checkbox"/> Males<br/> <input type="checkbox"/> Females<br/> <input type="checkbox"/> Unidentified/missing victims at the time of writing this report<br/> <i>For each category please provide the number and if the numbers are estimated or exact.</i></p>                                                                                                                                                                                                           |
| 35 | <p><b>Were there children requiring the attention of EMS?</b><br/> <input type="radio"/> Yes<br/> <input type="radio"/> No<br/> <input type="radio"/> Unknown<br/> <i>If yes number of:</i><br/> <input type="checkbox"/> Neonates (0-30 days)<br/> <input type="checkbox"/> Infants (1 month-2 years)<br/> <input type="checkbox"/> Young child (2-6 years)<br/> <input type="checkbox"/> Adolescent (12-18 years)<br/> <i>For each category please state if the number is estimated or exact.</i></p>   |
| 36 | <p><b>What was the number of deaths on-scene before any medical care was provided?</b></p>                                                                                                                                                                                                                                                                                                                                                                                                                |
| 37 | <p><b>What was the number of deaths after initial treatment, but before transport to hospital was started?</b></p>                                                                                                                                                                                                                                                                                                                                                                                        |
| 38 | <p><b>What was the number of deaths upon arrival at hospital, but for whom pre-hospital care and transport had been initiated?</b></p>                                                                                                                                                                                                                                                                                                                                                                    |
| 39 | <p><b>If available: what was the 30-day mortality of those admitted to hospital?</b><br/>Please state whether figures are estimated or exact, and if data collection of 30-day mortality of those admitted to hospital is considered complete.</p>                                                                                                                                                                                                                                                        |
| 40 | <p><b>Was a pre-hospital on- scene triage system used during the major incident response?</b><br/> <input type="radio"/> Yes<br/> <input type="radio"/> No<br/> <input type="radio"/> Unknown<br/> <br/> <i>If yes:</i><br/> <b>Who performed the on-scene pre-hospital triage?</b><br/> <input type="checkbox"/> Physician<br/> <input type="checkbox"/> EMS personnel<br/> <input type="checkbox"/> Other. Please specify.<br/> <br/> <b>Which triage system was used?</b></p>                          |
| 41 | <p><b>Number of patients in each category upon first assessment on scene</b><br/> <input type="checkbox"/> Red = immediate<br/> <input type="checkbox"/> Yellow = urgent<br/> <input type="checkbox"/> Green = minor/delayed<br/> <input type="checkbox"/> Black = deceased<br/> <input type="checkbox"/> Other categories? Please specify.<br/> <i>For each category please specify if the numbers are estimated or exact and please provide the data source from which these numbers originate.</i></p> |
| 42 | <p><b>Were any patients attended by EMS or medical staff at a primary health care facility and not admitted to hospital?</b><br/> <input type="radio"/> Yes<br/> <input type="radio"/> No<br/> <input type="radio"/> Unknown<br/> <i>If yes:</i><br/> <i>How many patients sustained minor injuries? Is the number given estimated or exact and from which data source do these numbers originate?</i></p>                                                                                                |
| 43 | <p><b>Was there any over-or undertriage?</b><br/> <input type="radio"/> Yes<br/> <input type="radio"/> No<br/> <input type="radio"/> Unknown<br/> <i>If yes: what was the % of overtriage, what was the % of undertriage. Please state any definition for triage precision calculations as well as the data source.</i></p>                                                                                                                                                                               |
| 44 | <p><b>What was the total number of patients seeking care at a hospital?</b><br/> <br/> <b>What was the total number of patients admitted to hospital?</b><br/> <br/> <b>How many of the admitted patients were discharged within 24 hours?</b><br/> <i>Please state whether figures are estimated or exact and provide the data source (e.g.: hospital records).</i></p>                                                                                                                                  |

|    |                                                                                                                                                                                                                                                                                                                                                                                                                                                                                                                                                                                                                                                                                                                                                                                                                                                                                                                                                                                                   |
|----|---------------------------------------------------------------------------------------------------------------------------------------------------------------------------------------------------------------------------------------------------------------------------------------------------------------------------------------------------------------------------------------------------------------------------------------------------------------------------------------------------------------------------------------------------------------------------------------------------------------------------------------------------------------------------------------------------------------------------------------------------------------------------------------------------------------------------------------------------------------------------------------------------------------------------------------------------------------------------------------------------|
| 45 | <p><b>Did any patients sustain the following types of injury?</b></p> <ul style="list-style-type: none"> <li><input type="checkbox"/> Blunt trauma</li> <li><input type="checkbox"/> Penetrating trauma</li> <li><input type="checkbox"/> Burns</li> <li><input type="checkbox"/> Drowning</li> <li><input type="checkbox"/> Asphyxiation</li> <li><input type="checkbox"/> Hypothermia</li> <li><input type="checkbox"/> Intoxication/poisoning</li> <li><input type="checkbox"/> Infectious disease</li> <li><input type="checkbox"/> Acute psychiatric symptoms</li> <li><input type="checkbox"/> Nuclear or radiological injury</li> <li><input type="checkbox"/> Biological injury</li> <li><input type="checkbox"/> Chemical injury</li> <li><input type="checkbox"/> Other types of injury</li> </ul> <p><i>If possible: for each ticked alternative please specify the number, if the number is estimated or exact and please state the data source for which the numbers derive.</i></p> |
| 46 | <p><b>Were any patients admitted to critical care area?</b></p> <ul style="list-style-type: none"> <li><input type="radio"/> Yes</li> <li><input type="radio"/> No</li> <li><input type="radio"/> Unknown</li> </ul> <p><i>If yes:</i><br/> <i>Please state the number of patients admitted to critical care area, if the number is estimated or exact and state the data source.</i><br/> <i>Please explain how you define critical care.</i></p>                                                                                                                                                                                                                                                                                                                                                                                                                                                                                                                                                |
